# Supplementary material for: In Situ SERS Sensing by a Laser-Induced Aggregation of Silver Nanoparticles Templated on a Thermoresponsive Polymer
Source: MDPI journal article supplement (doi:10.3390/bios12080628), 2022-08-11
Supplement: s1 [file s1]

Supporting Information

# ***In situ* SERS sensing by a laser-induced aggregation of silver nanoparticles templated on a thermoresponsive polymer**

Larisa V. Sigolaeva <sup>1\*</sup>, Natalia L. Nechaeva <sup>2</sup>, Anton I. Ignatov <sup>3,4</sup>, Lyubov Y. Filatova <sup>1</sup>, Timur Z. Sharifullin <sup>1</sup>, Jonas Eichhorn <sup>5</sup>, Felix H. Schacher <sup>5,6,7</sup>, Dmitry V. Pergushov <sup>1,8</sup>, Alexander M. Merzlikin <sup>9</sup> and Ilya N. Kurochkin <sup>1,2\*</sup>

<sup>1</sup> M.V. Lomonosov Moscow State University, Department of Chemistry, 119991 Moscow, Russia

<sup>2</sup> N.M. Emanuel Institute of Biochemical Physics of Russian Academy of Sciences, 119334 Moscow, Russia

<sup>3</sup> All-Russia Research Institute of Automatics, 127055 Moscow, Russia

<sup>4</sup> National Research Moscow State University of Civil Engineering, 129337 Moscow, Russia

<sup>5</sup> Institute of Organic Chemistry and Macromolecular Chemistry (IOMC), Friedrich-Schiller-University Jena, D-07743 Jena, Germany

<sup>6</sup> Jena Center for Soft Matter (JCSM), Friedrich-Schiller-University Jena, D-07743 Jena, Germany

<sup>7</sup> Center for Energy and Environmental Chemistry (CEEC), Friedrich-Schiller-University Jena, D-07743 Jena, Germany

<sup>8</sup> N.N. Semenov Federal Research Center of Chemical Physics of Russian Academy of Sciences, 119991 Moscow, Russia

<sup>9</sup> Institute of Theoretical and Applied Electromagnetics of Russian Academy of Sciences, 125412 Moscow, Russia

\* Correspondence: [lsigolaeva@belozersky.msu.ru](mailto:lsigolaeva@belozersky.msu.ru) (L.V.S.); Tel.: +7 495 939 40 42; [ikur@sky.chph.ras.ru](mailto:ikur@sky.chph.ras.ru) (I.N.K.)  
Tel.: +7 495 939 43 91

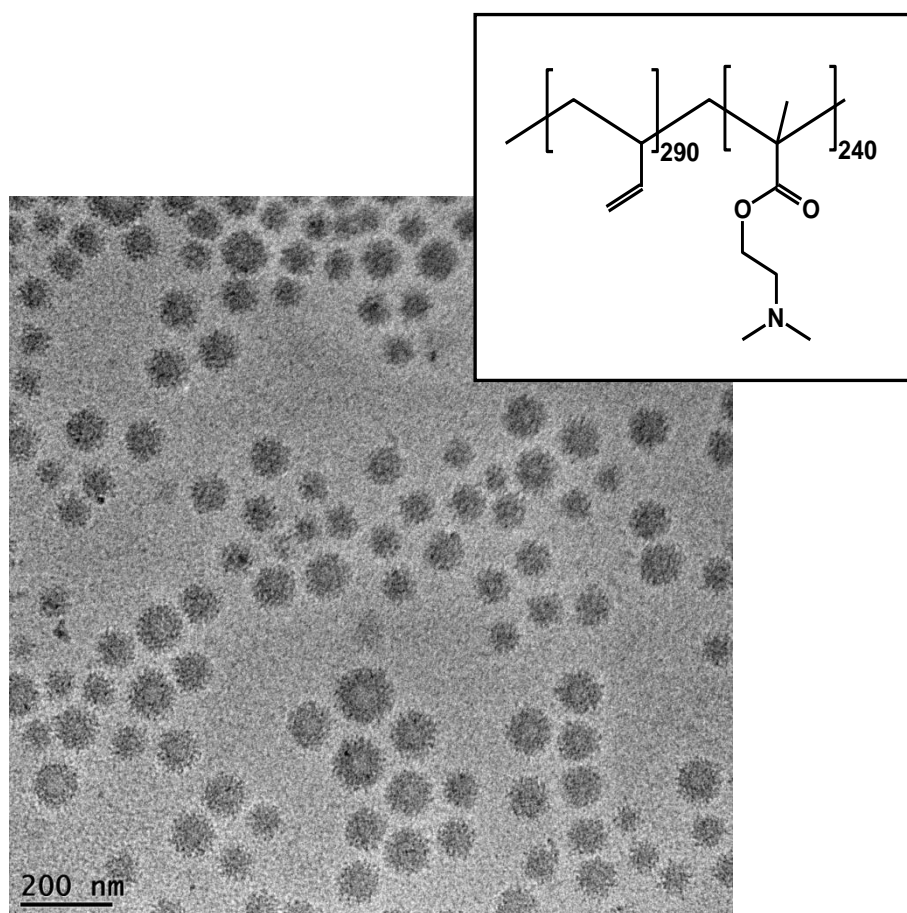

**Figure S1.** The chemical structure of the PB-*b*-PDMAEMA (A) and the cryo-TEM micrograph of the PB-*b*-PDMAEMA micelles in 50 mM sodium phosphate ( $c = 2.5$  g/L) at pH 7.0 (B).

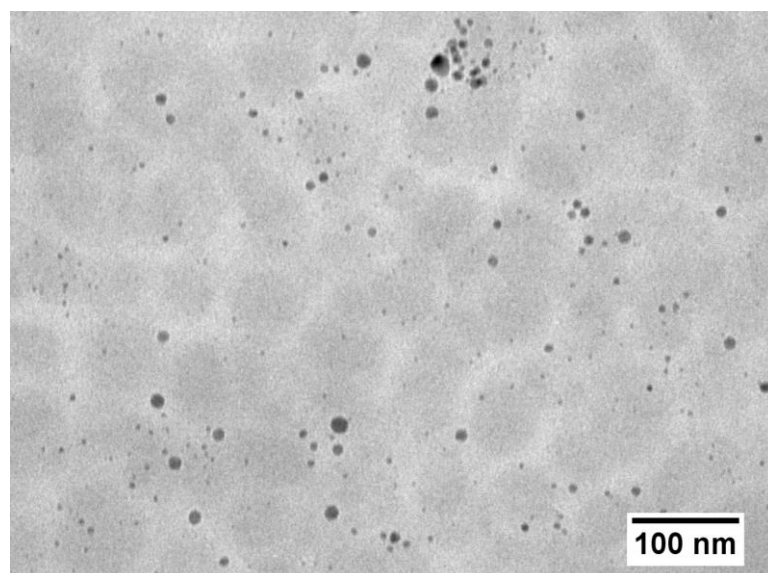

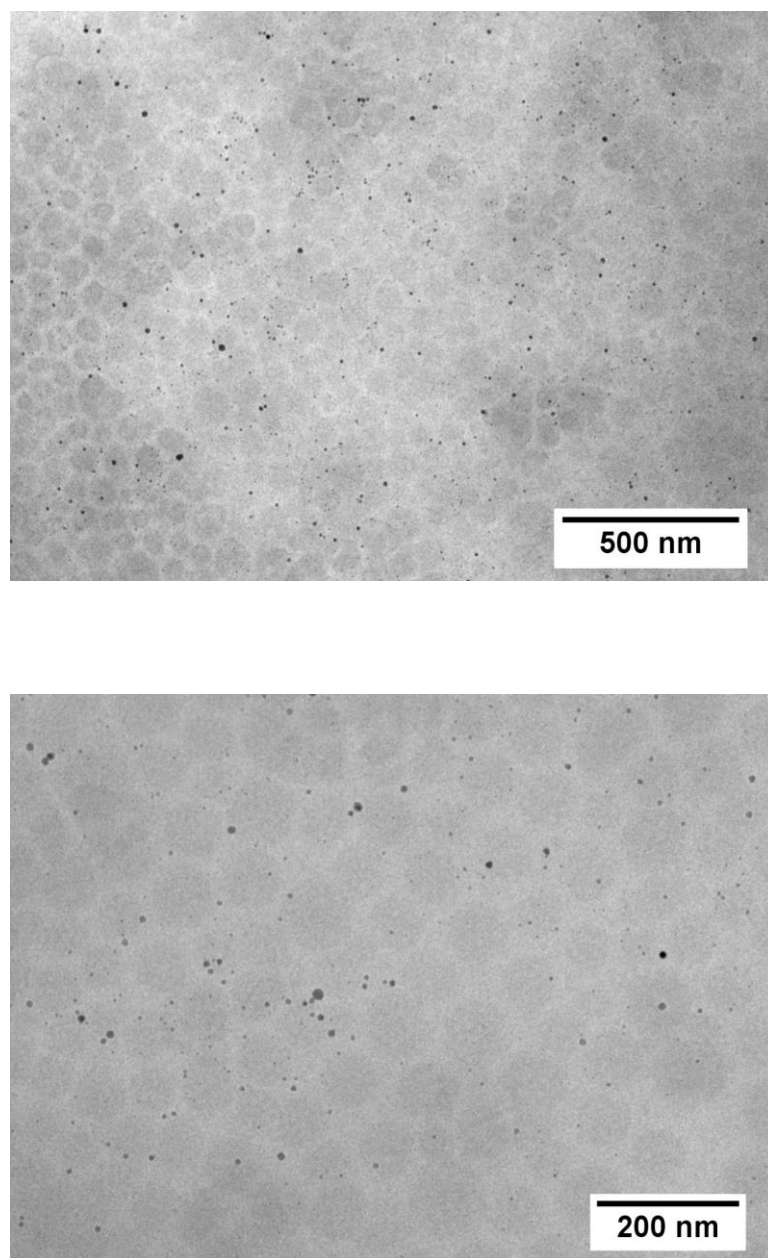

**Figure S2.** The TEM images of the AgNPs/PB-*b*-PDMAEMA hybrids taken from different places of the sample at different magnification.

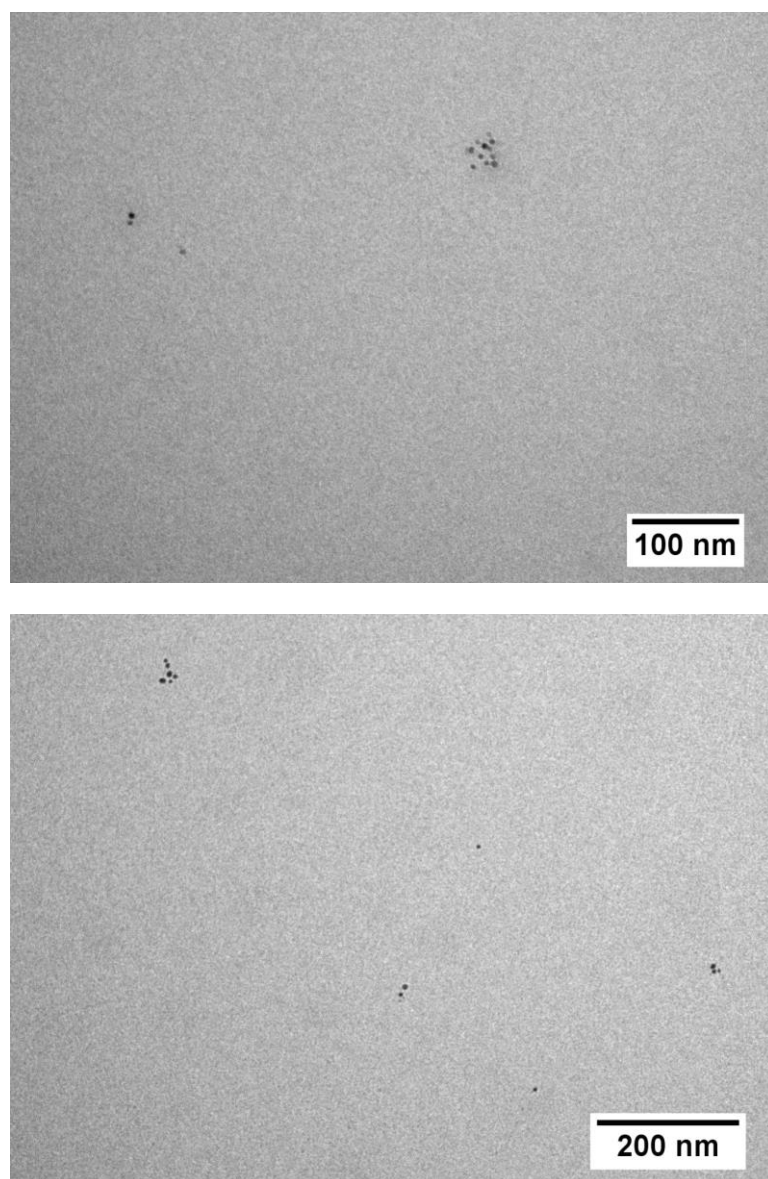

**Figure S3.** The TEM images of the control AgNPs sample that was synthesized under the same conditions in the absence of the PB-*b*-PDMAEMA micelles.

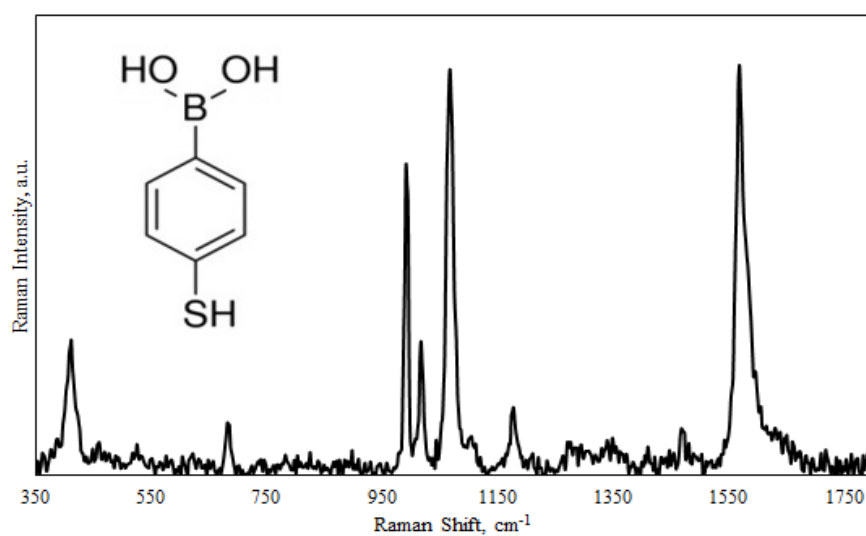

**Figure S4.** The SERS spectrum of 4-MPBA with characteristic vibrations. Inset: the chemical structure of 4-MPBA. The peak at  $1070\text{ cm}^{-1}$ , which is related to the in-plane benzene ring breathing mode coupled with the C-S stretching mode, was used as an analytical signal for the SERS experiments. Conditions: an aqueous solution of 4-MPBA with the concentration of  $30\text{ }\mu\text{M}$  was mixed with the sample of the AgNPs/PB-*b*-PDMAEMA hydrid in a 1:1 ratio, after 30 minutes a  $10\text{ }\mu\text{l}$  aliquot of the mixture was applied onto aluminium foil and the SERS spectrum was acquired.
